# Supplementary material
Source: PubMed Central journal article supplement (PMC3457275)
Supplement: JVI.00986-12_zjv999096585so1.pdf [file JVI.00986-12_zjv999096585so1.pdf]

## Supplemental Material

**Table S1. EAEC strains tested for susceptibility of P13374 and for the presence of an undisturbed *wrbA* gene**

| Strain no. | Serotype            | <i>wrbA</i> | <i>aggR</i> |
|------------|---------------------|-------------|-------------|
| C600       | <i>E. coli</i> K-12 | +           | -           |
| CB13374    | O104:H4             | -           | +           |
| CB7374     | O111:H10            | +           | +           |
| CB7373     | O111:H10            | +           | +           |
| CB11798    | O111:H10            | +           | +           |
| CB7878     | O111:H21            | -           | +           |
| CB5479     | O111:H21            | +           | +           |
| CB5089     | O111:H21            | +           | +           |
| CB9662     | O126:H27            | +           | +           |
| CB9648     | O126:H27            | +           | +           |
| CB9300     | O127:H11            | +           | +           |
| CB10001    | O130:H6             | +           | +           |
| CB9968     | O15:H18             | +           | +           |
| CB9149     | O153:H30            | +           | +           |
| C1585-68   | O156:H11            | +           | +           |
| E78634     | O165:NM             | +           | +           |
| 2533-54    | O175:H28            | +           | +           |
| U14-41     | O3:H2               | +           | +           |
| 17-2       | O3:H2               | +           | +           |
| F17        | O44:H18             | +           | +           |
| CB9712     | O55:H21             | +           | +           |
| K11a       | O65:NM              | +           | +           |
| CB8415     | O7:H18              | +           | +           |
| CB6360     | O73:H12             | +           | +           |
| CB8404     | O77:H18             | +           | +           |
| CB6814     | O78:H10             | +           | +           |
| CB6092     | O86:H2              | +           | +           |
| H307B      | O91:NM              | +           | +           |
| CB1676     | O92:H33             | +           | +           |
| CB6877     | O92:H33             | +           | +           |
| CB6140     | O92:H33             | +           | +           |
| CB5555     | O92:H33             | +           | +           |
| CB4950     | Ont:H30             | +           | +           |

**Table S2. Accession numbers of phage and chromosomal integration sites**

| <b>Accession No</b> | <b>phage</b> | <b>strain</b> | <b>type of sequence</b> | <b>character</b>       |
|---------------------|--------------|---------------|-------------------------|------------------------|
| HE775127            | P8983        |               | viral                   | attP                   |
| HE775128            | P13344       |               | viral                   | attP                   |
| HE775129            | P13374       |               | viral                   | attP                   |
| HE775130            | P13771       |               | viral                   | attP                   |
| HE775131            | P13772       |               | viral                   | attP                   |
| HE775132            |              | CB8983        | proviral                | left integration site  |
| HE775133            |              | CB13344       | proviral                | left integration site  |
| HE775134            |              | CB13374       | proviral                | left integration site  |
| HE775135            |              | CB13771       | proviral                | left integration site  |
| HE775136            |              | CB13772       | proviral                | left integration site  |
| HE775137            |              | TPE2369       | proviral                | left integration site  |
| HE775138            |              | TPE2385       | proviral                | left integration site  |
| HE775139            |              | TPE2364       | proviral                | left integration site  |
| HE775140            |              | TPE2381       | proviral                | left integration site  |
| HE775141            |              | TPE2383       | proviral                | left integration site  |
| HE775266            |              | CB13374       | proviral                | right integration site |
| HE775267            |              | CB13344       | proviral                | right integration site |
| HE775268            |              | CB8983        | proviral                | right integration site |
| HE775269            |              | CB13771       | proviral                | right integration site |
| HE775270            |              | CB13772       | proviral                | right integration site |
| HE775271            |              | TPE2369       | proviral                | right integration site |
| HE775272            |              | TPE2385       | proviral                | right integration site |
| HE775273            |              | TPE2364       | proviral                | right integration site |
| HE775274            |              | TPE2381       | proviral                | right integration site |
| HE775275            |              | TPE2383       | proviral                | right integration site |
